# Supplementary material for: Review of Developments in Combating COVID-19 by Vaccines, Inhibitors, Radiations, and Nonthermal Plasma
Source: MDPI journal article supplement (doi:10.3390/cimb44110384), 2022-11-15
Supplement: s1 [file s1]

## **Supplementary information**

### **Review of developments in combating COVID19 by vaccines, inhibitors, radiations, and nonthermal plasma**

Ihn Han<sup>1,2,†,\*</sup>, Sohail Mumtaz<sup>2,3,†</sup>, Dharmendra Kumar Yadav<sup>4</sup>, Sekar Ashok Kumar<sup>2</sup>,  
and Eun Ha Choi<sup>1,2,3,\*</sup>

**Table S1. Human Coronavirus epidemiology and genomic information**

| Human Coronavirus (HCoV) | Reservoir | Host        | Identified country & year | Causes                      | Incubation period (Days) | Genome feature |            |                 | Amino acid length (Receptor binding) | Cellular Receptor                  | Co receptor      | Genome order                                  |
|--------------------------|-----------|-------------|---------------------------|-----------------------------|--------------------------|----------------|------------|-----------------|--------------------------------------|------------------------------------|------------------|-----------------------------------------------|
|                          |           |             |                           |                             |                          | Strand         | Range (kb) | G+C content (%) |                                      |                                    |                  |                                               |
| Alpha-coronavirus        |           |             |                           |                             |                          |                |            |                 |                                      |                                    |                  |                                               |
| HCoV-229E                | Bats      | palm civets | 1960                      | S, F, DC, M & D             | 2-5                      | + RNA          | 27,317     | 38              | 407-547                              | ANPEP                              | -                | 5'-ORF1a-ORF1b-S-ORF4a-ORF4b-E-M-N-polyT-3'   |
| HCoV-NL63                | Bats      | Bats        | Netherland, 2004          | F, DC & EI                  | 2-4                      | + RNA          | 27,553     | 34              | 476–616                              | ACE2 receptor                      | Heparan sulphate | 5'-ORF1a-ORF1b-S-ORF3-E-M-N-polyT-3'          |
| Beta-coronaviruses       |           |             |                           |                             |                          |                |            |                 |                                      |                                    |                  |                                               |
| HCoV-OC43                | Mice      | Cattle      | 1967                      | CC, S, F DC, ST, D & Pn     | 2-5                      |                | 30,738     | 37              | 15–302                               | 9-O-acetylsialic acids as receptor | Sialic acid      | 5'-ORF1a-ORF1b-NS2a-HE-S-ORF5-E-M-N-polyT-3'  |
| SARS-CoV                 | Bats      | civet cat   | 2003 China                | CC, F, DC, SB & Pn          | 2-11                     |                | 29,751     | 41              | 306–527                              | ACE2                               | C-type lectins   | 5'-ORF1a-ORF1b-S-SP-E-M-SP-ORF8-SP-N-polyT-3' |
| HCoV-HKU1                | Mice      | Mice        | 2005 Hong Kong            | CC, S, F, DC, ST, M, D & Pn | 2-4                      |                | 29,926     | 32              | 15–302                               | 9-O-acetylsialic acids as receptor | Sialic acids     | 5'-ORF1a-ORF1b-HE-S-ORF4-E-M-N-polyT-3'       |
| MERS-CoV                 | Bats      | Dromedary   | 2012                      | DC, SB,                     | 2-13                     |                | 30,119     | 41              | 367–606                              | Dipeptidyl                         | -                | 5'-ORF1a-                                     |

|            |      |        |              |                       |     |  |        |    |         |                             |                |                                                        |
|------------|------|--------|--------------|-----------------------|-----|--|--------|----|---------|-----------------------------|----------------|--------------------------------------------------------|
|            |      | camels | Saudi Arabia | Pn, & D               |     |  |        |    |         | peptidase-4 (DPP4) receptor |                | ORF1b-S-NS4b-E-M-N-polyT-3'                            |
| SARS-CoV-2 | Bats | Bats   | 2019 China   | F, DC, SB, M, Pn, OFD | 3-8 |  | 29,903 | 38 | 333–527 | ACE2                        | C-type lectins | 5'-ORF1a-ORF1b-S-ORF3-SP-E-M-SP-ORF8a-ORF8b-N-polyT-3' |

**Note:** S (Sneezing), F (Fever), DC (Dry Cough), ST (Sore Throat), M (Myalgia), D (Diarrhea), F (Febrile), EI (Eye Inflammation), CC (Common Cold), Pn (Pneumonia), SB (Shortness of Breath), OFD (Organ Failure and even Death). ORF (Open reading frame) 1a and ORF 1b non-structural protein common to all group, S- spike protein, E- Envelop protein, M- Membrane protein, N- Nucleocapsid protein, HE- Hemagglutinin esterase, NS2a- Phosphodiesterase activity, SP- structural protein, ORF8-Beta coronavirus

**Table S2. Candidates' clinical RNA and DNA vaccines (WHO, 23<sup>rd</sup> February 2022)**

| Type of vaccine                                           | Number of doses | Route of administration | Schedule (Day) | Phase | Developers                                                            |                       |
|-----------------------------------------------------------|-----------------|-------------------------|----------------|-------|-----------------------------------------------------------------------|-----------------------|
| <b>RNA based Vaccine</b>                                  |                 |                         |                |       |                                                                       |                       |
| mRNA 1273                                                 | 2               | IM                      | 0 to 24        | 4     | Moderna + national institute of allergy and infection disease (NIAID) | Gilbert, et al., 2021 |
| BNT162b2 (3LNP-mRNAs)                                     | 2               | IM                      | 0 to 21        | 4     | Pfizer/BioNTech+Fosun pharma                                          | Thomas, et al., 2021  |
| mRNA-1273.351, lipid nanoparticle (LNP)-encapsulated mRNA | 3               | IM                      | 0-28/56        | 4     | Moderna+ national institute of allergy and infection disease (NIAID)  |                       |
| mRT555                                                    | 2               | IM                      | 0-21           | 4     | Sanofi Pasteur and Translate Bio                                      |                       |

|                                                                                                       |     |    |         |     |                                                                                               |  |
|-------------------------------------------------------------------------------------------------------|-----|----|---------|-----|-----------------------------------------------------------------------------------------------|--|
| CVnCoV                                                                                                | 2   | IM | 0 to 21 | 3   | Cure Vac AG                                                                                   |  |
| SARS-CoV-2 mRNA vaccine (ARCOV)                                                                       | 2   | IM | 0-14/28 | 3   | Academy of military science (AMS)<br>Walvax biotechnology and Suzhou<br>Abogan and bioscience |  |
| ARCT-154 mRNA                                                                                         | 2   | IM | 0-28    | 3   | Arcturus Therapeutic, Inc.                                                                    |  |
| Ds-5670a                                                                                              | 2   | IM | NR      | 2/3 | Daiichi Sankyo Co Ltd.                                                                        |  |
| mRNA-1273.211; booster candidate<br>complaining mRNA-1273+mRNA-<br>1273.351                           | 1   | IM | 0       | 2/3 | ModernaTx, Inc.                                                                               |  |
| ARCT-021                                                                                              | NR  | IM | NR      | 2   | Arcturus Therapeutics                                                                         |  |
| PTX-COVID19-B                                                                                         | 2   | IM | 0-28    | 2   | Providence Therapeutics                                                                       |  |
| LNP-nCoVsaRNA                                                                                         | 2   | IM | NR      | 1   | Imperial college London                                                                       |  |
| ChulaCoV19 mRNA                                                                                       | 2   | IM | 0-21    | 1   | Chulalongkorn University                                                                      |  |
|                                                                                                       |     |    |         |     |                                                                                               |  |
| CoV2 SAM (LNP). A self- amplifying<br>mRNA (SAM) lipid nanoparticle (LNP)<br>platform + spike antigen | 2   | IM | 0-30    | 1   | GlaxoSmithKline                                                                               |  |
| HDT-301-self replicating mRNA vaccine<br>formulated lipid nanoparticle                                | 2   | IM | 0-28    | 1   | SENAI CIMATEC                                                                                 |  |
| mRNA-1283; mRNA-1283.211                                                                              | 2   | IM | 0-28    | 1   | ModernaTX, Inc                                                                                |  |
|                                                                                                       |     |    |         |     |                                                                                               |  |
| mRNA COVID-19                                                                                         | 2   | IM | TBT     | 1   | Shanghai East Hospital and<br>Stemirna Therapeutics                                           |  |
| LNP-nCoV saRNA-02; saRNA<br>encapsulated lipid nanoparticle                                           | 2   | IM | 0-28    | 1   | MRC/UVRI and Uganda research<br>unit                                                          |  |
| HDT-301                                                                                               | 1-2 | IM | 0-56    | 1   | HDT Bio                                                                                       |  |
| VLPCOV-01,                                                                                            | 2   | IM | NR      | 1   | VLP Therapeutic Japan GK                                                                      |  |
| EXG-5003, RBD SARS-CoV-2-spike<br>protein                                                             | 1   | ID | 0       | 1/2 | Elixirgen Therapeutic, Inc                                                                    |  |
| ARCT-165 mRNA                                                                                         | 2   | IM | 0-29    | 1/2 | Arcturus Therapeutic, Inc.                                                                    |  |
| ARCT-021 mRNA                                                                                         | 2   | IM | 0-29    | 1/2 | Arcturus Therapeutic, Inc.                                                                    |  |
| EG-COVID                                                                                              | 3   | IM | 0-21-42 | 1/2 | EyeGene Inc.                                                                                  |  |

|                                                                                    |     |          |                |     |                                                                            |  |
|------------------------------------------------------------------------------------|-----|----------|----------------|-----|----------------------------------------------------------------------------|--|
| <b>DNA based vaccine</b>                                                           |     |          |                |     |                                                                            |  |
| INO-4800+electroporation                                                           | 2   | ID       | 0 + 28         | 3   | Inovio Pharmaceuticals +<br>International Vaccine Institute +<br>Advaccine |  |
| nCov vaccine                                                                       | 3   | ID       | 0 + 28 +<br>56 | 3   | Zydus Cadila                                                               |  |
| AG0301-COVID19                                                                     | 2   | IM       | 0 + 14         | 2/3 | AnGes + Takara Bio + Osaka<br>University                                   |  |
|                                                                                    |     |          |                |     |                                                                            |  |
| GX-19N                                                                             | 2   | IM       | 0 + 28         | 2/3 | Genexine Consortium                                                        |  |
| Covigenix VAX-001 - DNA vaccines +<br>proteo-lipid vehicle (PLV) formulation       | 2   | IM       | 0 + 14         | 1   | Entos Pharmaceuticals Inc.                                                 |  |
| CORVax12 - Spike (S) Protein Plasmid<br>DNA Vaccine                                | 2   | ID       | 0 + 14         | 1   | OncoSec Immunotherapies;<br>Providence Health & Services                   |  |
| baCTRL-Spike oral DNA vaccine                                                      | 1   | Oral     | 0              | 1   | Symvivo Corporation                                                        |  |
| Plasmid DNA vaccine SCOV1 + SCOV2.<br>COVIDITY                                     | 2   | ID/IM    | 0 + 28         | 1   | Scancell Ltd                                                               |  |
| COVIGEN                                                                            | 2   | ID or IM | 0 + 28         | 1   | University of Sydney, Bionet Co.,<br>Ltd<br>Technoalia                     |  |
| SARS-CoV-2 DNA vaccine (delivered<br>IM followed by electroporation)               | 2   | IM       | 0 + 21         | 1   | The University of Hong Kong;<br>Immuno Cure 3 Limited                      |  |
| Prophylactic pDNA Vaccine Candidate<br>Against COVID-19                            | 3   | IM       | 0 + 21 +<br>42 | 1   | Imam Abdulrahman Bin Faisal<br>University                                  |  |
| GLS-5310                                                                           | 2   | ID       | 0 + 56         | 1/2 | GeneOne Life Science, Inc.                                                 |  |
| COVID-eVax, a candidate plasmid DNA<br>vaccine of the Spike protein                | 2   | IM       | 0 + 28         | 1/2 | Takis + Rottapharm Biotech                                                 |  |
| AG0302-COVID19                                                                     | 2-3 | IM       | 0 + 14 +<br>28 | 1/2 | AnGes, Inc/Osaka University                                                |  |
| VB10.2129, a DNA plasmid vaccine,<br>encoding the receptor binding domain<br>(RBD) | 1-2 | IM       | 0 + 21         | 1/2 | Vaccibody AS                                                               |  |

|                                                                                                                                                     |     |    |        |     |              |  |
|-----------------------------------------------------------------------------------------------------------------------------------------------------|-----|----|--------|-----|--------------|--|
| VB10.2210, DNA plasmid vaccine, encodes multiple immunogenic and conserved T cell epitopes spanning multiple antigens across the SARS-CoV-2 genome. | 1-2 | IM | 0 + 21 | 1/2 | Vaccibody AS |  |
|-----------------------------------------------------------------------------------------------------------------------------------------------------|-----|----|--------|-----|--------------|--|
